# Supplementary material for: Intramolecular 13C analysis of tree rings provides multiple plant ecophysiology signals covering decades
Source: PubMed Central journal article supplement (PMC5864875; doi:10.1038/s41598-018-23422-2), 2018-03-22
Supplement: 41598_2018_23422_MOESM1_ESM.pdf [file 41598_2018_23422_MOESM1_ESM.pdf]

## Intramolecular $^{13}\text{C}$ analysis of tree rings provides multiple plant ecophysiology signals covering decades - Supporting Information

Thomas Wieloch, Ina Ehlers, Jun Yu, David Frank, Michael Grabner, Arthur Gessler, Jürgen Schleucher

### *Site and samples - Additional information*

Table S1 summarises spatial and temporal information for all samples included in this study. Sampling sites cover a wide range of ecological conditions. Important ecological features of the *Pinus nigra* sampling site include an "open canopy with low competition among trees", "shallow, very dry soils", and "limited or completely absent forest management disturbances"<sup>1</sup>. Dominant trees with umbrella-shaped crowns indicating regular water scarcity were selected for sampling. Two 5-mm cores of each of 19 trees (approximate ages, 92-156 years) were taken at breast height. These samples have been used in several former studies<sup>1-5</sup>, for which their annual rings were carefully dated by standard dendrochronological methods<sup>6</sup>. To preclude growth-related signals in our data, we focused the subsampling on tree rings formed during 1961 to 1995 when all trees had reached a comparably stable canopy position. Thus, isotopic shifts due to the contribution of soil-respired  $\text{CO}_2$  or related mechanisms should be absent or negligible.

**Table S1.** Spatial and temporal information for all samples included in this study.

|                      | Species                            | Site                      | Tree rings [years] | Lat. [°] | Long. [°] | Altitude [m AMSL] |
|----------------------|------------------------------------|---------------------------|--------------------|----------|-----------|-------------------|
| Angiosperms          | <i>Acer saccharum</i>              | Wisconsin, USA            | 1997-2009          | 45.7N    | 89.5W     | 480               |
|                      | <i>Fagus sylvatica</i>             | Austria                   | 2005-2011          | 47.15N   | 14.28E    | 840               |
|                      | <i>Juglans regia</i>               | Kyrgyzstan                | 1850-1859          | 41.78N   | 71.93E    | 1400              |
|                      | <i>Liquidambar styraciflua</i>     | Tennessee, USA            | 2000-2005          | 35.9N    | 84.33W    | 230               |
|                      | <i>Quercus robur</i>               | England                   | 1989-1994          | 52.83N   | 0.5E      | 25                |
|                      | <i>Shorea superba</i>              | Borneo, Malaysia          | 1970-1980          | 5.02N    | 117.82E   | 170               |
| Gymnosperms          | <i>Juniperus zeravshanica</i>      | Uzbekistan                | 1850-1859          | 39.62N   | 68.49E    | 2200              |
|                      | <i>Phyllocladus aspleniifolius</i> | Average of three samples: |                    |          |           |                   |
|                      |                                    | Tasmania, Australia       | 2005-2011          | 43.13S   | 146.692E  | 225               |
|                      |                                    | Tasmania, Australia       | 1980-1989          | 42.21S   | 145.43E   | 250               |
|                      |                                    | Tasmania, Australia       | 1990-1999          | 42.21S   | 145.43E   | 250               |
|                      | <i>Picea abies</i>                 | Austria                   | 1910-1919          | 47.18N   | 14.16E    | 1300              |
|                      | <i>Pinus nigra</i>                 | Austria                   | 1961-1995          | 48.13N   | 16.23E    | 350               |
|                      | <i>Pinus ponderosa</i>             | Arizona, USA              | 1850-1860          | 32.41N   | 110.72W   | 2423              |
| <i>Thuja plicata</i> | Idaho, USA                         | 1850-1859                 | 47.19N             | 116.29W  | 1380      |                   |

### *$^{13}\text{C}$ EA-IRMS and $^{13}\text{C}$ NMR Spectroscopy - Additional information*

For Elemental Analysis - Isotope Ratio Mass Spectrometry (EA-IRMS) measurements we used a Flash EA 2000 coupled to a DeltaV system (both from Thermo Fisher Scientific Inc., Bremen, Germany). Repeated measurements ( $n \geq 2$ ) confirmed that the equipment provided high accuracy and precision (long-term standard deviation of instrumental measurements:  $\pm 0.15\%$  SD).

For quantitative  $^{13}\text{C}$  NMR, samples of 1,2-O-isopropylidene- $\alpha$ -D-glucofuranose were dissolved in 160  $\mu\text{l}$  deionised water and D-acetonitrile (CAS: 2206-26-0, filling height=35 mm). Either 5 or 6 mg of the relaxation agent  $\text{Cr}(\text{acac})_3$  (CAS: 21679-31-2; 5 mg for > 80 mg samples, 6 mg for 20 to 80 mg samples) were added. Samples of 3,6-anhydro-1,2-O-isopropylidene- $\alpha$ -D-glucofuranose were dissolved in D-acetonitrile (filling height=35 mm), and 8 mg  $\text{Cr}(\text{acac})_3$  was added. We determined longitudinal relaxation times ( $T_1$ ) by inversion recovery experiments and adjusted the recycle delay to allow for complete relaxation ( $\geq 10 T_1$ ) of all relevant  $^{13}\text{C}$  nuclei. Quantitative  $^{13}\text{C}$  NMR spectra were acquired at 298 K using a  $90^\circ$  pulse of 8.07 to 8.7  $\mu\text{s}$ , following published procedures<sup>7</sup>.

By increasing the measurement time with decreasing sample amounts, we achieved signal-to-noise ratios (accumulated over all the spectra) of 900 to 1670 (average: 1270) per sample. Samples <20 mg were excluded from analysis, because too much measurement time would have been required for sufficient precision. All free induction decays were processed by the same operator and protocol: exponential apodization with a line broadening of 1 Hz; automatic phase correction plus subsequent manual phase correction if required; automatic baseline correction of the 10-130 ppm spectral range by a 3<sup>rd</sup> order polynomial. Lorentzian line shape fitting was applied for signal deconvolution. We calculated average areas under  $^{13}\text{C}$  NMR signals,  $S_i$ , by averaging integrals over all replicate spectra.

### *Intramolecular $^{13}\text{C}$ distributions of tree-ring glucose*

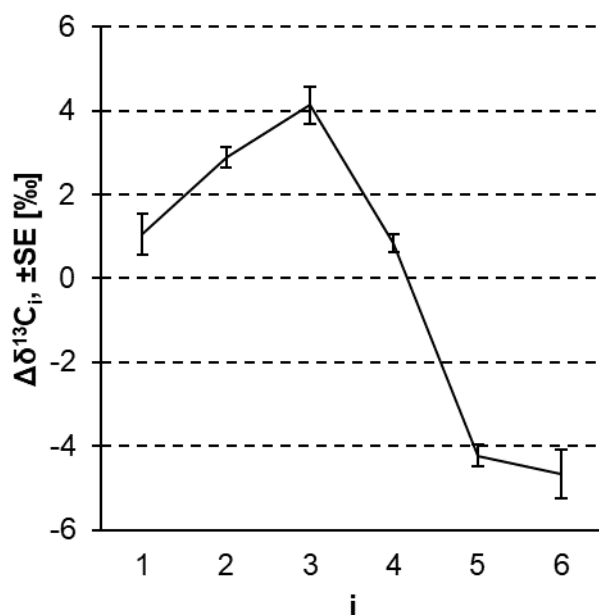

**Figure S1.** Intramolecular  $^{13}\text{C}$  distributions of tree-ring glucose. Data were acquired for six angiosperm and six gymnosperm species from ecologically different sites with global coverage (Table S1). Solid line, average over all angiosperms and gymnosperms,  $\pm\text{SE}$ . In the biochemical literature, intramolecular  $^{13}\text{C}$  distributions are commonly expressed as  $\Delta\delta^{13}\text{C}_i$ , the deviations of positional  $^{13}\text{C}$  abundances from the molecular average. In contrast, in the ecophysiological literature the  $\Delta$  scale representing fractionation against  $^{13}\text{C}$  is preferred. To promote comparability with previously published intramolecular  $^{13}\text{C}$  distributions in the biochemical literature, we here express  $^{13}\text{C}$  distributions of tree-ring glucose in terms of  $\Delta\delta^{13}\text{C}_i$ . Consequently, the distributions here and in the main text (Fig. 1) appear vertically mirrored around the molecular average.

### ***Test for autocorrelation in $^{13}\text{C}$ time-series***

A tree ring formed in a particular year may have had significant input of stored glucose monomers from previous years. If so,  $^{13}\text{C}$  time-series should exhibit autocorrelation signals. To test this possibility, we correlated each  $^{13}\text{C}$  time-series with three temporally lagged versions of itself. No significant autocorrelation ( $r=0.37$  to  $0.40$  for  $p \leq 0.05$  with  $n=28$  to  $25$ ) was detected (Tables S2, S3). Therefore, our analyses does not consider conditions of previous years.

**Table S2.** Pearson correlation coefficients of  $\Delta_i(t)$  versus  $\Delta_i(t+\tau)$  and  $\Delta(t)$  versus  $\Delta(t+\tau)$ , with  $t$  and  $(t+\tau)$  denoting  $^{13}\text{C}$  time-series without and with temporal lag, respectively.

| $\tau$ [years] | $\Delta_1$ | $\Delta_2$ | $\Delta_3$ | $\Delta_4$ | $\Delta_5$ | $\Delta_6$ | $\Delta$ |
|----------------|------------|------------|------------|------------|------------|------------|----------|
| -1             | 0.22       | 0.29       | 0.10       | -0.11      | -0.23      | 0.25       | 0.07     |
| -2             | 0.11       | 0.22       | 0.09       | 0.02       | -0.01      | -0.10      | 0.09     |
| -3             | -0.04      | 0.00       | -0.30      | -0.15      | -0.09      | -0.11      | -0.19    |

**Table S3.** Pearson correlation coefficients of  $\Delta'_i(t)$  versus  $\Delta'_i(t+\tau)$ , with  $t$  and  $(t+\tau)$  denoting  $^{13}\text{C}$  time-series without and with temporal lag, respectively.

| $\tau$ [years] | $\Delta'_1$ | $\Delta'_2$ | $\Delta'_3$ | $\Delta'_4$ | $\Delta'_5$ | $\Delta'_6$ |
|----------------|-------------|-------------|-------------|-------------|-------------|-------------|
| -1             | 0.23        | 0.33        | 0.12        | -0.10       | -0.25       | 0.28        |
| -2             | 0.07        | 0.26        | 0.07        | -0.03       | -0.01       | -0.24       |
| -3             | -0.05       | 0.10        | -0.27       | -0.08       | 0.03        | -0.18       |

### ***Determination of growing season length***

We define the growing season as the months with a median number of days  $\geq 10$ , over the observation period 1961-1995, with an average air temperature  $\geq 5$  °C. Figure S2 shows the number of days per month with  $\geq 5$  °C at Hohe Warte (Vienna, Austria, WMO ID: 1103500) during the period 1961-1995 ( $n=35$ ). According to the applied definition, the growing season at our site extends from March to November.

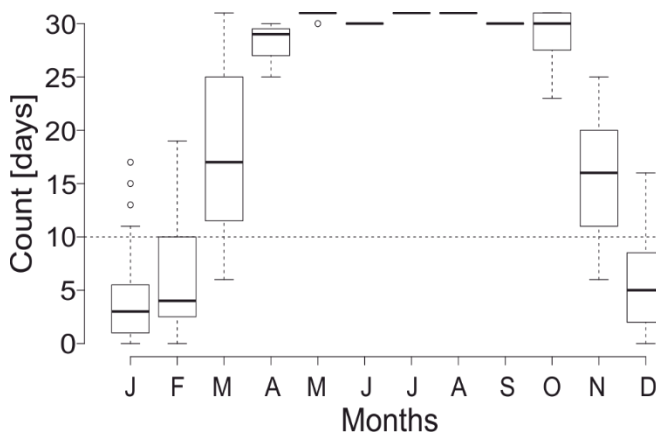

**Figure S2.** Number of days per month with average air temperatures  $\geq 5$ °C during the period 1961-1995 at the Hohe Warte meteorological station (Vienna, Austria, WMO ID: 1103500).

## Effects of air vapour pressure deficit on $^{13}\text{C}$ discrimination

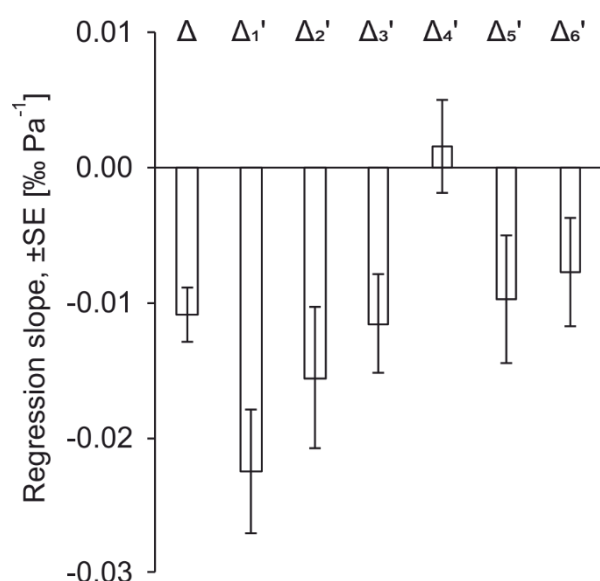

**Figure S3.** Effects of growing season air vapour pressure deficit (VPD) on whole-molecule  $^{13}\text{C}$  discrimination,  $\Delta$ , and on positional  $^{13}\text{C}$  discrimination,  $\Delta_i'$ . Data were acquired for tree-ring glucose of *Pinus nigra* laid down from 1961 to 1995 at a moisture-limited site in the Vienna basin. Bars represent slopes of ordinary least squares regressions,  $b$  and  $b_i' \pm \text{SE}$ .

### ANCOVA

Growing season air vapour pressure deficit (VPD) is significantly correlated with both  $\Delta$  and  $\Delta_1'$  ( $r=-0.72$ ,  $p=5.4 \times 10^{-6}$  and  $r=-0.68$ ,  $p=3 \times 10^{-5}$ , respectively,  $n=31$ ). However, the slope of the  $\Delta$ ~VPD regression is only half as steep as the slope of the  $\Delta_1'$ ~VPD regression (Fig. 2,  $-0.011 \pm 0.002 \text{SE } \text{‰ Pa}^{-1}$  and  $-0.023 \pm 0.005 \text{SE } \text{‰ Pa}^{-1}$ , respectively). According to ANCOVA, this slope difference is statistically significant ( $p=0.02$ , Table S4).

**Table S4.** Summary of iso~VPD\*method ANCOVA modelling output, with iso denoting combined  $\Delta$  and  $\Delta_1'$  data, VPD denoting growing season air vapour pressure deficit, and method as a categorical variable assigning iso data to either  $\Delta$  or  $\Delta_1'$ . Asterisks denote the significance of model terms (\*,  $p \leq 0.05$ ; \*\*\*,  $p \leq 10^{-3}$ ). The interaction term vpd:method contributes significantly to the model ( $p=0.02$ ), showing that responses of  $\Delta$  and  $\Delta_1'$  to VPD differ significantly.

|            | Sum of squares | Df | F value | Pr(>F)        | Significance |
|------------|----------------|----|---------|---------------|--------------|
| vpd        | 67.315         | 1  | 45.24   | 8.45E-09      | ***          |
| method     | 121.947        | 1  | 81.95   | 1.086E-12     | ***          |
| vpd:method | 8.092          | 1  | 5.44    | <b>0.0232</b> | *            |

### References

1. Leal, S., Eamus, D., Grabner, M., Wimmer, R. & Cherubini, P. Tree rings of *Pinus nigra* from the Vienna basin region (Austria) show evidence of change in climatic sensitivity in the late 20th century. *Canadian Journal of Forest Research* **38**, 744-759 (2008).
2. Leal, S., Melvin, T.M., Grabner, M., Wimmer, R. & Briffa, K.R. Tree-ring growth variability in the Austrian Alps: the influence of site, altitude, tree species and climate. *Boreas* **36**, 426-440 (2007).

3. Strumia, G., Wimmer, R. & Grabner, M. Dendroclimatic sensitivity of *Pinus nigra* Arnold in Austria. *Dendrochronologia* **15**, 129-137 (1997).
4. Strumia, G., PhD thesis: Tree-ring based reconstruction of precipitation in Eastern Austria. (Institute of Botany, University of Natural Resources and Life Sciences, Vienna; 1999).
5. Wimmer, R., Strumia, G. & Holawe, F. Use of false rings in Austrian pine to reconstruct early growing season precipitation. *Canadian Journal of Forest Research* **30**, 1691-1697 (2000).
6. Speer, J.H. Fundamentals of tree-ring research. (The University of Arizona Press, Tucson; 2010).
7. Chaintreau, A. et al. Site-specific  $^{13}\text{C}$  content by quantitative isotopic  $^{13}\text{C}$  Nuclear Magnetic Resonance spectrometry: A pilot inter-laboratory study. *Analytica Chimica Acta* **788**, 108-113 (2013).
